# Supplementary material
Source: Springer Nature journal article supplement (https://www.springermedizin.de/resource/supplementary/12931_2010_1116_MOESM7_ESM.pdf/9425686)

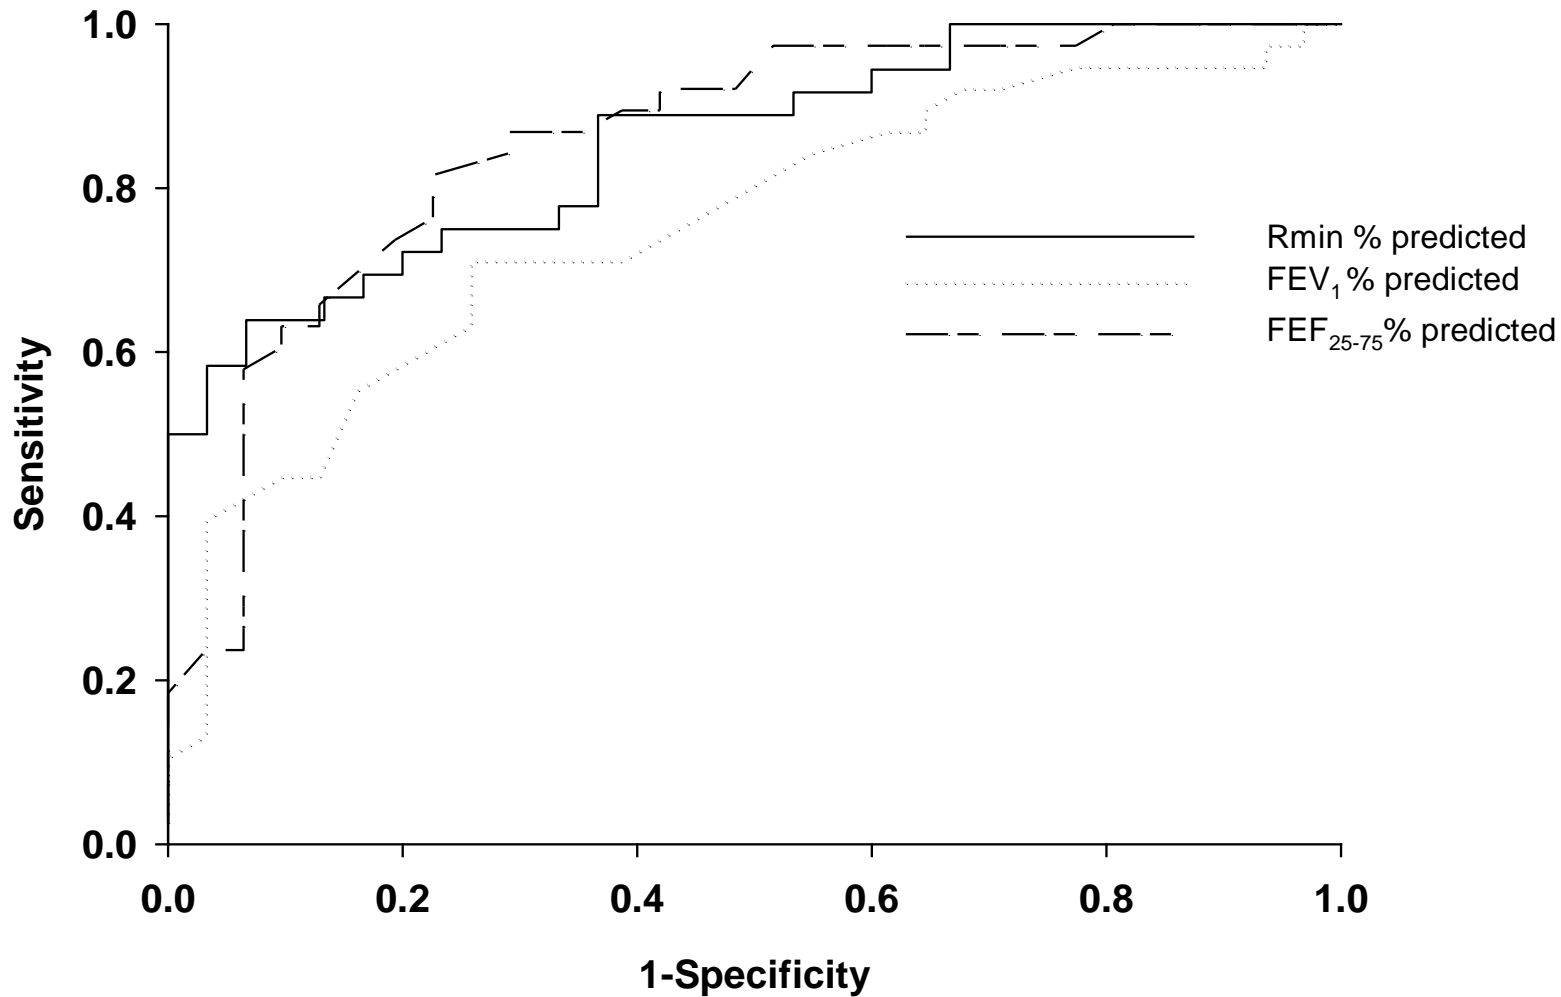

Supplement: MOESM7 [file 9425686]
